# Supplementary material
Source: HighWire-hosted journal article supplement (https://bmjopen.bmj.com/content/15/3/e089900)
Supplement: inline-supplementary-material-1 [file inline-supplementary-material-1.pdf]

## Supplementary Online Content

### **Patient-Surgeon Racial and Ethnic Concordance and Outcomes of Older Adults Operated on by California Licensed Surgeons: An Observational Study**

eTable 1: Coding schema for Medical Board of California survey question regarding “cultural background” translated to racial and ethnic background

eTable 2: Association of patient-surgeon racial and ethnic concordance with 30-day post-operative mortality rate among Black and Hispanic patients

eTable 3: Baseline characteristics among sample with surgeon self-reported race and ethnicity missing versus study cohort with surgeon race-ethnicity reported

eTable 4: Sensitivity analysis to model adjusted outcomes, controlling for surgeons without self-reported race and ethnicity using inverse probability weighting

eTable 5: Sensitivity analysis for adjusted outcomes, excluding surgeons with multiple race and ethnicity categories

eTable 6: Adjusted outcomes for hospitals with any Black or Hispanic concordant dyads compared to those without concordant dyads

eTable 7: Sensitivity analysis for adjusted outcomes, excluding hospitals without Black or Hispanic surgeons

eTable 8: Sensitivity analysis for adjusted outcomes using a continuous indicator variable for number of chronic conditions

eTable 9: Sensitivity analysis for definition of 30-day readmission as readmission within 30-days of discharge from initial procedure hospitalization

eTable 10. The effect of patient-surgeon racial and ethnic concordance on outcomes among Black and Hispanic patients, stratified by procedure

eTable 11. The effect of patient-surgeon racial and ethnic concordance on outcomes among Black and Hispanic patients, stratified by high versus low morbidity procedures

eTable 12. Baseline characteristics of White patients, according to patient-surgeon racial and ethnic concordance

eTable 13. Association of patient-surgeon racial and ethnic concordance with postoperative outcomes among White patients

eFigure 1: Association of patient-surgeon racial and ethnic concordance with postoperative outcomes among White patients

eFigure 2: Subgroup analysis of postoperative outcomes by patient and procedure characteristics among White patients

eTable 14. The effect of patient-surgeon racial and ethnic concordance on outcomes among White patients, stratified by procedure

eTable 15: Secondary analysis for composite outcome of readmission or mortality within 30 days of procedure date

**eTable 1:** Coding schema for Medical Board of California survey question regarding “cultural background” translated to racial and ethnic background

| <b>Race and ethnicity category</b> | <b>MBC survey response for "Cultural Background"</b> |
|------------------------------------|------------------------------------------------------|
| Black or African American          | African                                              |
|                                    | African American                                     |
|                                    | Black                                                |
| Hispanic                           | Central American                                     |
|                                    | Cuban                                                |
|                                    | Mexican                                              |
|                                    | Other Hispanic                                       |
|                                    | Puerto Rican                                         |
|                                    | South American                                       |
| Non-Hispanic White                 | European                                             |
|                                    | Middle Eastern                                       |
|                                    | White                                                |

**eTable 2:** Association of patient-surgeon racial and ethnic concordance with 30-day post-operative mortality rate among Black and Hispanic patients

|                                                 | Black patients        |                     | Black patients<br>Adjusted risk<br>difference, pp<br>(95%CI) | p-<br>value | Hispanic patients   |                     | Hispanic patients<br>Adjusted risk<br>difference, pp<br>(95%CI) | p-<br>value |
|-------------------------------------------------|-----------------------|---------------------|--------------------------------------------------------------|-------------|---------------------|---------------------|-----------------------------------------------------------------|-------------|
|                                                 | Concordant            | Discordant          |                                                              |             | Concordant          | Discordant          |                                                                 |             |
| <b>Adjusted mortality rate,<br/>% (95%CI)</b>   | 0.8<br>(0 to 2.7)     | 1.4<br>(0.8 to 1.9) | -0.5<br>(-2.6 to +1.6)                                       | 0.63        | 1.2<br>(0.3 to 2.1) | 1.7<br>(1.3 to 2.2) | -0.5<br>(-1.6 to +0.5)                                          | 0.32        |
| <b>Adjusted readmission rate,<br/>% (95%CI)</b> | 10.4<br>(6.1 to 14.7) | 7.3<br>(6.1 to 8.6) | +3.1<br>(-1.5 to +7.6)                                       | 0.19        | 4.2<br>(2.6 to 5.8) | 6.6<br>(5.8 to 7.4) | -2.4<br>(-4.3 to -0.5)                                          | 0.014       |
| <b>Adjusted LOS,<br/>days (95%CI)</b>           | 5.3<br>(4.1 to 6.5)   | 5.1<br>(4.8 to 5.4) | +0.2*<br>(-1.1 to +1.5)                                      | 0.79        | 4.1<br>(3.8 to 4.4) | 4.6<br>(4.4 to 4.8) | -0.5*<br>(-0.8 to -0.2)                                         | 0.003       |

Association between patient-surgeon racial and ethnic concordance and 30-day mortality, 30-day readmissions, and length of stay among Black and Hispanic patients using Medicare data from 2016-2019 calculated using marginal standardization from generalized linear probability models, controlling for patient (age, sex, race and ethnicity, 27 chronic conditions, median household income, dual-eligibility for Medicaid) procedure (procedure type, weekend surgery, electiveness of surgery, month, year), surgeon (age, sex, procedure volume), and hospital (size, teaching, urban/rural, and ownership status) characteristics. Estimated adjusted outcome lower bound set at 0. Abbreviations: d, day; LOS, length of stay.; pp, percentage point. \*unit: day

**eTable 3:** Baseline characteristics among sample with surgeon self-reported race and ethnicity missing versus study cohort with surgeon race-ethnicity reported

| Characteristic                          | Surgeons without self-reported race & ethnicity<br>(N=324,074) | Surgeons with self-reported race & ethnicity<br>(N=45,547) | P-value |
|-----------------------------------------|----------------------------------------------------------------|------------------------------------------------------------|---------|
| <b>Patients, No. (%)</b>                |                                                                |                                                            | NA      |
| <b>Patient characteristics</b>          |                                                                |                                                            |         |
| Patient age, y, mean (SD)               | 75.0 (6.7)                                                     | 75.1 (6.8)                                                 | <0.001  |
| Patient sex                             |                                                                |                                                            |         |
| Male                                    | 143,611 (44.3)                                                 | 19,911 (43.7)                                              | 0.02    |
| Female                                  | 180,463 (55.7)                                                 | 25,636 (56.3)                                              |         |
| Dual Medicare Medicaid, No. (%)         | 32,546 (10.0)                                                  | 5,848 (12.8)                                               | <0.001  |
| Median household income*, \$, mean (SD) | 77,132 (31521.1)                                               | 80,304 (33423.6)                                           | <0.001  |
| Coexisting conditions, No. (%)          |                                                                |                                                            |         |
| Congestive heart failure                | 77,073 (23.8)                                                  | 11,354 (24.9)                                              | <0.001  |
| Chronic obstructive pulmonary disease   | 78,560 (24.2)                                                  | 11,076 (24.3)                                              | 0.72    |
| Diabetes                                | 114,719 (35.4)                                                 | 16,342 (35.9)                                              | 0.04    |
| Chronic kidney disease                  | 107,285 (33.1)                                                 | 15,066 (33.1)                                              | 0.91    |
| Neurological disorders                  | 61,072 (18.9)                                                  | 8,902 (19.5)                                               | <0.001  |
| Cancer                                  | 68,182 (21.0)                                                  | 9,882 (21.7)                                               | 0.001   |
| <b>Surgeon Characteristics</b>          |                                                                |                                                            |         |
| Surgeon age, y, mean (SD)               | 49.4 (10.3)                                                    | 52.0 (11.0)                                                | <0.001  |
| Surgeon Gender, No (%)                  |                                                                |                                                            |         |
| Male                                    | 5,716 (88.7)                                                   | 878 (89.5)                                                 | 0.47    |
| Female                                  | 727 (11.3)                                                     | 103 (10.5)                                                 |         |
| Surgical volume (tertiles)              |                                                                |                                                            |         |
| 1 (Lowest)                              | 11,618 (3.6)                                                   | 1,671 (3.7)                                                | <0.001  |
| 2                                       | 61,363 (18.9)                                                  | 9,408 (20.7)                                               |         |
| 3 (Highest)                             | 251,093 (77.5)                                                 | 34,468 (75.7)                                              |         |
| <b>Hospital Characteristics</b>         |                                                                |                                                            |         |
| Hospital size, beds                     |                                                                |                                                            |         |
| ≤399                                    | 216,215 (66.7)                                                 | 31,446 (69.0)                                              | <0.001  |
| >399                                    | 107,859 (33.3)                                                 | 14,101 (31.0)                                              |         |
| Teaching hospital                       |                                                                |                                                            |         |
| Yes                                     | 209,421 (64.6)                                                 | 27,168 (59.7)                                              | <0.001  |
| No                                      | 114,653 (35.4)                                                 | 18,379 (40.4)                                              |         |
| Hospital ownership                      |                                                                |                                                            |         |
| For-profit                              | 50,755 (15.7)                                                  | 6,822 (15.0)                                               | <0.0001 |
| Not-for-profit                          | 245,245 (75.7)                                                 | 32,672 (71.7)                                              |         |
| Public                                  | 28,074 (8.7)                                                   | 6,053 (13.3)                                               |         |
| Urban area                              |                                                                |                                                            |         |
| Yes                                     | 320,703 (99.0)                                                 | 45,157 (99.1)                                              | <0.001  |
| No                                      | 3,371 (1.0)                                                    | 390 (0.9)                                                  |         |

\*Median household income is estimated from the beneficiary's zip code of residency. Medicare data from 2016-2019.

**eTable 4:** Sensitivity analysis to model adjusted outcomes, controlling for surgeons without self-reported race and ethnicity using inverse probability weighting  
**A. Black and Hispanic patients**

|                                             | Black patients        |                     | Black patients<br>Adjusted risk<br>difference, pp<br>(95%CI) | p-<br>value | Hispanic patients   |                     | Hispanic patients<br>Adjusted risk<br>difference, pp<br>(95%CI) | p-<br>value |
|---------------------------------------------|-----------------------|---------------------|--------------------------------------------------------------|-------------|---------------------|---------------------|-----------------------------------------------------------------|-------------|
|                                             | Concordant            | Discordant          |                                                              |             | Concordant          | Discordant          |                                                                 |             |
| <b>Adjusted mortality rate, % (95%CI)</b>   | 0.8<br>(0 to 2.6)     | 1.2<br>(0.7 to 1.8) | -0.4<br>(-2.4 to +1.6)                                       | 0.69        | 1.1<br>(0.3 to 2.0) | 1.7<br>(1.3 to 2.1) | -0.6<br>(-1.6 to +0.5)                                          | 0.29        |
| <b>Adjusted readmission rate, % (95%CI)</b> | 10.0<br>(5.8 to 14.2) | 7.4<br>(6.0 to 8.7) | +2.6<br>(-1.8 to +7.0)                                       | 0.25        | 4.2<br>(2.5 to 6.0) | 6.6<br>(5.7 to 7.4) | -2.3<br>(-4.3 to -0.4)                                          | 0.02        |
| <b>Adjusted LOS, d (95%CI)</b>              | 5.1<br>(3.9 to 6.3)   | 5.0<br>(4.7 to 5.2) | +0.1*<br>(-1.1 to +1.4)                                      | 0.83        | 4.1<br>(3.8 to 4.3) | 4.5<br>(4.4 to 4.7) | -0.5*<br>(-0.8 to -0.2)                                         | 0.004       |

**B. White patients**

|                                             | White patients      |                     | White patients<br>Adjusted risk<br>difference, pp<br>(95%CI) | p-<br>value |
|---------------------------------------------|---------------------|---------------------|--------------------------------------------------------------|-------------|
|                                             | Concordant          | Discordant          |                                                              |             |
| <b>Adjusted mortality rate, % (95%CI)</b>   | 1.5<br>(1.4 to 1.6) | 1.4<br>(1.0 to 1.8) | +0.2<br>(-0.3 to +0.6)                                       | 0.51        |
| <b>Adjusted readmission rate, % (95%CI)</b> | 6.6<br>(6.3 to 6.9) | 7.0<br>(6.3 to 7.8) | -0.4<br>(-1.3 to +0.4)                                       | 0.34        |
| <b>Adjusted LOS, d (95%CI)</b>              | 4.3<br>(4.3 to 4.4) | 4.2<br>(4.1 to 4.4) | +0.1*<br>(0 to +0.3)                                         | 0.13        |

Association between patient-surgeon racial and ethnic concordance and 30-day mortality, 30-day readmissions, and length of stay among Black, Hispanic, and White patients, controlling for surgeons without self-reported race and ethnicity, using Medicare data from 2016-2019 calculated using marginal standardization from inverse probability weighting of linear probability models, controlling for patient (age, sex, race and ethnicity, 27 chronic conditions, median household income, dual-eligibility for Medicaid) procedure (procedure type, weekend surgery, electiveness of surgery, month, year), surgeon (age, sex, procedure volume), and hospital (size, teaching, urban/rural, and ownership status) characteristics. Estimated adjusted outcome lower bound set at 0. Abbreviations: d, day; LOS, length of stay.; pp, percentage point. \*unit: adjusted days

**eTable 5:** Sensitivity analysis for adjusted outcomes, excluding surgeons with multiple race and ethnicity categories**A. Black and Hispanic patients**

|                                             | Black patients        |                     | Black patients<br>Adjusted risk<br>difference, pp<br>(95%CI) | p-<br>value | Hispanic patients    |                      | Hispanic patients<br>Adjusted risk<br>difference, pp<br>(95%CI) | p-<br>value |
|---------------------------------------------|-----------------------|---------------------|--------------------------------------------------------------|-------------|----------------------|----------------------|-----------------------------------------------------------------|-------------|
|                                             | Concordant            | Discordant          |                                                              |             | Concordant           | Discordant           |                                                                 |             |
| <b>Adjusted mortality rate, % (95%CI)</b>   | 0.8<br>(0 to 2.7)     | 1.4<br>(0.8 to 1.9) | -0.5<br>(-2.6 to +1.6)                                       | 0.63        | 1.2<br>(0.3 to 2.1)  | 1.7<br>(1.3 to 2.2)  | -0.5<br>(-1.6 to +0.5)                                          | 0.32        |
| <b>Adjusted readmission rate, % (95%CI)</b> | 10.4<br>(6.1 to 14.7) | 7.3<br>(6.1 to 8.6) | +3.1<br>(-1.5 to +7.6)                                       | 0.19        | 4.2<br>(2.6 to 5.9)  | 6.6<br>(5.7 to 7.4)  | -2.3<br>(-4.2 to -0.4)                                          | 0.02        |
| <b>Adjusted LOS, d (95%CI)</b>              | 5.3<br>(4.1 to 6.5)   | 5.1<br>(4.8 to 5.4) | +0.2*<br>(-1.1 to +1.5)                                      | 0.79        | 4.1*<br>(3.8 to 4.4) | 4.6*<br>(4.4 to 4.8) | -0.5*<br>(-0.9 to -0.2)                                         | 0.001       |

**B. White patients**

|                                             | White patients      |                     | White patients<br>Adjusted risk<br>difference, pp<br>(95%CI) | p-<br>value |
|---------------------------------------------|---------------------|---------------------|--------------------------------------------------------------|-------------|
|                                             | Concordant          | Discordant          |                                                              |             |
| <b>Adjusted mortality rate, % (95%CI)</b>   | 1.6<br>(1.4 to 1.7) | 1.5<br>(1.1 to 1.9) | +0.1<br>(-0.3 to +0.5)                                       | 0.68        |
| <b>Adjusted readmission rate, % (95%CI)</b> | 6.5<br>(6.2 to 6.8) | 7.2<br>(6.4 to 7.9) | -0.6<br>(-1.5 to +0.2)                                       | 0.12        |
| <b>Adjusted LOS, d (95%CI)</b>              | 4.3<br>(4.3 to 4.4) | 4.2<br>(4.1 to 4.3) | +0.1*<br>(0 to +0.3)                                         | 0.07        |

Association between patient-surgeon racial and ethnic concordance and 30-day mortality, 30-day readmissions, and length of stay among Black, Hispanic, and White patients, excluding surgeons with multiple race and ethnicity categories, using Medicare data from 2016-2019 calculated using marginal standardization from linear probability models, controlling for patient (age, sex, race and ethnicity, 27 chronic conditions, median household income, dual-eligibility for Medicaid) procedure (procedure type, weekend surgery, electiveness of surgery, month, year), surgeon (age, sex, procedure volume), and hospital (size, teaching, urban/rural, and ownership status) characteristics. Estimated adjusted outcome lower bound set at 0. Abbreviations: d, day; LOS, length of stay.; pp, percentage point. \*unit: adjusted days

**eTable 6:** Adjusted outcomes for hospitals with any Black or Hispanic concordant dyads compared to those without concordant dyads**A. Black and Hispanic patients**

|                                             | Black patients         |                           | Black patients<br>Adjusted risk<br>difference, pp<br>(95%CI) | p-<br>value | Hispanic patients      |                              | Hispanic patients<br>Adjusted risk<br>difference, pp<br>(95%CI) | p-<br>value |
|---------------------------------------------|------------------------|---------------------------|--------------------------------------------------------------|-------------|------------------------|------------------------------|-----------------------------------------------------------------|-------------|
|                                             | Concordant<br>hospital | No concordant<br>hospital |                                                              |             | Concordant<br>hospital | No<br>concordant<br>hospital |                                                                 |             |
| <b>Adjusted mortality rate, % (95%CI)</b>   | 1.2<br>(0.4 to 1.8)    | 1.4<br>(0.7 to 2.1)       | -0.3<br>(-1.3 to +0.7)                                       | 0.56        | 1.5<br>(0.9 to 2.0)    | 1.8<br>(1.2 to 2.4)          | -0.3<br>(-1.1 to +0.5)                                          | 0.44        |
| <b>Adjusted readmission rate, % (95%CI)</b> | 8.0<br>(6.1 to 9.9)    | 7.5<br>(5.8 to 9.1)       | +0.5<br>(-2.1 to +3.1)                                       | 0.70        | 5.7<br>(4.7 to 6.8)    | 6.5<br>(5.5 to 7.6)          | -0.8<br>(-2.3 to +0.8)                                          | 0.32        |
| <b>Adjusted LOS, d (95%CI)</b>              | 5.3<br>(4.8 to 5.7)    | 5.0<br>(4.7 to 5.4)       | +0.2*<br>(-0.4 to +0.8)                                      | 0.52        | 4.5<br>(4.3 to 4.7)    | 4.6<br>(4.4 to 4.8)          | -0.1*<br>(-0.4 to +0.2)                                         | 0.51        |

**B. White patients**

|                                             | White patients         |                           | White patients<br>Adjusted risk<br>difference, pp<br>(95%CI) | p-value | All patients           |                              | All patients<br>Adjusted risk<br>difference, pp<br>(95%CI) | p-value |
|---------------------------------------------|------------------------|---------------------------|--------------------------------------------------------------|---------|------------------------|------------------------------|------------------------------------------------------------|---------|
|                                             | Concordant<br>hospital | No concordant<br>hospital |                                                              |         | Concordant<br>hospital | No<br>concordant<br>hospital |                                                            |         |
| <b>Adjusted mortality rate, % (95%CI)</b>   | 1.5<br>(1.3 to 1.7)    | 1.6<br>(1.4 to 1.7)       | -0.2<br>(-0.4 to +0.2)                                       | 0.42    | 1.5<br>(1.3 to 1.6)    | 1.6<br>(1.5 to 1.8)          | -0.2<br>(-0.4 to +0.1)                                     | 0.24    |
| <b>Adjusted readmission rate, % (95%CI)</b> | 6.6<br>(6.2 to 7.0)    | 6.6<br>(6.3 to 6.9)       | 0.0<br>(-0.6 to +0.6)                                        | 0.99    | 6.6<br>(6.2 to 7.0)    | 6.6<br>(6.3 to 6.9)          | +0.1<br>(-0.1 to +0.1)                                     | 0.85    |
| <b>Adjusted LOS, d (95%CI)</b>              | 4.3<br>(4.3 to 4.4)    | 4.3<br>(4.3 to 4.4)       | 0*<br>(-0.1 to +0.1)                                         | 0.96    | 4.4<br>(4.3 to 4.5)    | 4.4<br>(4.3 to 4.4)          | 0*<br>(-0.1 to +0.1)                                       | 0.98    |

Association between hospital presence of a concordant dyad and 30-day mortality, 30-day readmissions, and length of stay among Black, Hispanic, White, and All patients, using Medicare data from 2016-2019 calculated using marginal standardization from linear probability models, controlling for patient (age, sex, race and ethnicity, 27 chronic conditions, median household income, dual-eligibility for Medicaid) procedure (procedure type, weekend surgery, electiveness of surgery, month, year), surgeon (age, sex, procedure volume), and hospital (size, teaching, urban/rural, and ownership status) characteristics. Abbreviations: d, day; LOS, length of stay.; pp, percentage point. \*unit: adjusted days



**eTable 7:** Sensitivity analysis for adjusted outcomes, excluding hospitals without Black or Hispanic surgeons**A. Black and Hispanic patients**

|                                             | Black patients       |                     | Black patients<br>Adjusted risk<br>difference, pp<br>(95%CI) | p-<br>value | Hispanic patients   |                     | Hispanic patients<br>Adjusted risk<br>difference, pp<br>(95%CI) | p-<br>value |
|---------------------------------------------|----------------------|---------------------|--------------------------------------------------------------|-------------|---------------------|---------------------|-----------------------------------------------------------------|-------------|
|                                             | Concordant           | Discordant          |                                                              |             | Concordant          | Discordant          |                                                                 |             |
| <b>Adjusted mortality rate, % (95%CI)</b>   | 1.3<br>(0 to 3.3)    | 1.1<br>(0.3 to 1.9) | +0.2<br>(-2.2 to +2.6)                                       | 0.88        | 1.5<br>(0.6 to 2.4) | 2.0<br>(1.4 to 2.6) | -0.5<br>(-1.7 to +0.6)                                          | 0.36        |
| <b>Adjusted readmission rate, % (95%CI)</b> | 9.9<br>(5.5 to 14.3) | 7.2<br>(5.4 to 9.1) | +2.6<br>(-2.4 to +7.7)                                       | 0.31        | 4.8<br>(3.1 to 6.4) | 7.0<br>(5.9 to 8.2) | -2.3<br>(-4.3 to -0.2)                                          | 0.03        |
| <b>Adjusted LOS, d (95%CI)</b>              | 5.3<br>(4.1 to 6.6)  | 5.3<br>(4.9 to 5.8) | +0.02*<br>(-1.4 to +1.5)                                     | 0.98        | 4.3<br>(4.0 to 4.6) | 4.8<br>(4.5 to 5.0) | -0.5*<br>(-0.9 to -0.1)                                         | 0.008       |

**B. White patients**

|                                             | White patients      |                     | White patients<br>Adjusted risk<br>difference, pp<br>(95%CI) | p-<br>value |
|---------------------------------------------|---------------------|---------------------|--------------------------------------------------------------|-------------|
|                                             | Concordant          | Discordant          |                                                              |             |
| <b>Adjusted mortality rate, % (95%CI)</b>   | 1.6<br>(1.4 to 1.8) | 1.6<br>(1.2 to 2.0) | 0<br>(-0.5 to +0.5)                                          | 0.93        |
| <b>Adjusted readmission rate, % (95%CI)</b> | 6.3<br>(6.0 to 6.7) | 7.2<br>(6.5 to 8.0) | -0.9<br>(-1.8 to 0.02)                                       | 0.05        |
| <b>Adjusted LOS, d (95%CI)</b>              | 4.3<br>(4.3 to 4.4) | 4.3<br>(4.1 to 4.4) | +0.1*<br>(-0.1 to +0.2)                                      | 0.42        |

Association between patient-surgeon racial and ethnic concordance and 30-day mortality, 30-day readmissions, and length of stay among Black, Hispanic, and White patients, excluding hospitals without Black or Hispanic surgeons, using Medicare data from 2016-2019 calculated using marginal standardization from linear probability models, controlling for patient (age, sex, race and ethnicity, 27 chronic conditions, median household income, dual-eligibility for Medicaid) procedure (procedure type, weekend surgery, electiveness of surgery, month, year), surgeon (age, sex, procedure volume), and hospital (size, teaching, urban/rural, and ownership status) characteristics. Estimated adjusted outcome lower bound set at 0. Abbreviations: d, day; LOS, length of stay.; pp, percentage point. \*unit: adjusted days

**eTable 8:** Sensitivity analysis for adjusted outcomes using a continuous indicator variable for number of chronic conditions

| <b>A. Black and Hispanic patients</b>       |                       |                     |                                                                        |                     |                          |                     |                                                                           |                     |
|---------------------------------------------|-----------------------|---------------------|------------------------------------------------------------------------|---------------------|--------------------------|---------------------|---------------------------------------------------------------------------|---------------------|
|                                             | <b>Black patients</b> |                     | <b>Black patients<br/>Adjusted risk<br/>difference, pp<br/>(95%CI)</b> | <b>p-<br/>value</b> | <b>Hispanic patients</b> |                     | <b>Hispanic patients<br/>Adjusted risk<br/>difference, pp<br/>(95%CI)</b> | <b>p-<br/>value</b> |
|                                             | Concordant            | Discordant          |                                                                        |                     | Concordant               | Discordant          |                                                                           |                     |
| <b>Adjusted mortality rate, % (95%CI)</b>   | 0.8<br>(0 to 2.6)     | 1.4<br>(0.8 to 1.9) | -0.6<br>(-2.6 to +1.4)                                                 | 0.57                | 1.2<br>(0.3 to 2.1)      | 1.7<br>(1.3 to 2.2) | -0.6<br>(-1.6 to +0.5)                                                    | 0.29                |
| <b>Adjusted readmission rate, % (95%CI)</b> | 10.5<br>(6.2 to 14.8) | 7.3<br>(6.0 to 8.6) | +3.2<br>(-1.4 to +7.8)                                                 | 0.31                | 4.4<br>(2.7 to 6/0)      | 6.6<br>(5.7 to 7.4) | -2.2<br>(-4.1 to -0.3)                                                    | 0.02                |
| <b>Adjusted LOS, d (95%CI)</b>              | 5.2<br>(4.0 to 6.4)   | 5.1<br>(4.8 to 5.4) | +0.1*<br>(-1.2 to +1.3)                                                | 0.93                | 4.1<br>(3.8 to 4.4)      | 4.6<br>(4.4 to 4.8) | -0.5*<br>(-0.9 to -0.2)                                                   | 0.002               |
| <b>B. White patients</b>                    |                       |                     |                                                                        |                     |                          |                     |                                                                           |                     |
|                                             | <b>White patients</b> |                     | <b>White patients<br/>Adjusted risk<br/>difference, pp<br/>(95%CI)</b> | <b>p-<br/>value</b> |                          |                     |                                                                           |                     |
|                                             | Concordant            | Discordant          |                                                                        |                     | Concordant               | Discordant          |                                                                           |                     |
| <b>Adjusted mortality rate, % (95%CI)</b>   | 1.6<br>(1.4 to 1.7)   | 1.4<br>(1.0 to 1.8) | +0.1<br>(-0.3 to +0.6)                                                 | 0.56                |                          |                     |                                                                           |                     |
| <b>Adjusted readmission rate, % (95%CI)</b> | 6.5<br>(6.3 to 6.8)   | 7.1<br>(6.3 to 7.8) | -0.6<br>(-1.4 to 0.3)                                                  | 0.17                |                          |                     |                                                                           |                     |
| <b>Adjusted LOS, d (95%CI)</b>              | 4.4<br>(4.3 to 4.4)   | 4.2<br>(4.1 to 4.4) | +0.1*<br>(0 to +0.3)                                                   | 0.10                |                          |                     |                                                                           |                     |

Association between patient-surgeon racial and ethnic concordance and 30-day mortality, 30-day readmissions, and length of stay among Black, Hispanic, and White patients, using Medicare data from 2016-2019 calculated using marginal standardization from linear probability models, controlling for patient (age, sex, race and ethnicity, indicator variable for number of 27 chronic conditions, median household income, dual-eligibility for Medicaid) procedure (procedure type, weekend surgery, electiveness of surgery, month, year), surgeon (age, sex, procedure volume), and hospital (size, teaching, urban/rural, and ownership status) characteristics. Estimated adjusted outcome lower bound set at 0. Abbreviations: d, day; LOS, length of stay.; pp, percentage point. \*unit: adjusted days

**eTable 9:** Sensitivity analysis for definition of 30-day readmission as readmission within 30-days of discharge from initial procedure hospitalization**A. Black and Hispanic patients**

|                                                     | Black patients        |                     | Black patients<br>Adjusted risk<br>difference, pp<br>(95%CI) | p-<br>value | Hispanic patients   |                     | Hispanic patients<br>Adjusted risk<br>difference, pp<br>(95%CI) | p-<br>value |
|-----------------------------------------------------|-----------------------|---------------------|--------------------------------------------------------------|-------------|---------------------|---------------------|-----------------------------------------------------------------|-------------|
|                                                     | Concordant            | Discordant          |                                                              |             | Concordant          | Discordant          |                                                                 |             |
| <b>Adjusted<br/>readmission rate, %<br/>(95%CI)</b> | 12.6<br>(8.0 to 17.3) | 8.3<br>(6.9 to 9.7) | +4.3<br>(-0.6 to +9.3)                                       | 0.09        | 5.1<br>(3.4 to 6.9) | 7.7<br>(6.8 to 8.6) | -2.5<br>(-4.6 to -0.5)                                          | 0.014       |

**B. White patients**

|                                                     | White patients      |                     | White patients<br>Adjusted risk<br>difference, pp<br>(95%CI) | p-<br>value |
|-----------------------------------------------------|---------------------|---------------------|--------------------------------------------------------------|-------------|
|                                                     | Concordant          | Discordant          |                                                              |             |
| <b>Adjusted<br/>readmission rate, %<br/>(95%CI)</b> | 7.5<br>(7.2 to 7.8) | 8.1<br>(7.3 to 8.9) | -0.6<br>(-1.5 to +0.3)                                       | 0.17        |

Association between patient-surgeon racial and ethnic concordance and 30-day readmissions (new definition) among Black, Hispanic, and White patients, using Medicare data from 2016-2019 calculated using marginal standardization from linear probability models, controlling for patient (age, sex, race and ethnicity, 27 chronic conditions, median household income, dual-eligibility for Medicaid) procedure (procedure type, weekend surgery, electiveness of surgery, month, year), surgeon (age, sex, procedure volume), and hospital (size, teaching, urban/rural, and ownership status) characteristics. Abbreviations: d, day; LOS, length of stay.; pp, percentage point. \*unit: adjusted days

**eTable 10.** The effect of patient-surgeon racial and ethnic concordance on outcomes among Black and Hispanic patients, stratified by procedure**A. 30-day postoperative mortality among Black patients**

| Procedure        | Concordance                 |                                    | Discordance                 |                                    | Adjusted risk difference, pp (95%CI) | p-value |
|------------------|-----------------------------|------------------------------------|-----------------------------|------------------------------------|--------------------------------------|---------|
|                  | No. patients (No. surgeons) | Adjusted mortality rate, % (95%CI) | No. patients (No. surgeons) | Adjusted mortality rate, % (95%CI) |                                      |         |
| Knee replacement | 45 (7)                      | 0.3 (0 to 1.0)                     | 617 (108)                   | 0.1 (0 to 0.4)                     | +0.1 (-0.4 to +0.7)                  | 0.65    |
| Hip replacement  | 43 (8)                      | 1.9 (0 to 9.5)                     | 325 (100)                   | 1.0 (0 to 2.3)                     | +1.0 (-7.4 to +9.3)                  | 0.82    |
| Laminectomy      | 30 (6)                      | 0 (0 to 2.6)                       | 267 (67)                    | 1.9 (0 to 3.9)                     | -5.9 (-13.9 to +2.2)                 | 0.15    |
| Cholecystectomy  | 20 (10)                     | 8.9 (0 to 18.6)                    | 98 (70)                     | 1.3 (0 to 4.0)                     | +7.6 (-2.8 to +18.1)                 | 0.15    |
| Colectomy        | 39 (10)                     | 0.8 (0 to 13.4)                    | 85 (56)                     | 6.7 (0 to 14.2)                    | -5.9 (-24.4 to +12.5)                | 0.52    |
| CABG             | 11 (3)                      | 6.5 (0 to 22.8)                    | 68 (29)                     | 0.4 (0 to 3.9)                     | +6.1 (-12.7 to +24.8)                | 0.51    |
| Lobectomy        | 13 (3)                      | 0 (0 to 20.9)                      | 64 (17)                     | 8.1 (0 to 16.6)                    | -17.4 (-54.3 to +19.4)               | 0.33    |
| Appendectomy     | 7 (6)                       | -                                  | 28 (25)                     | -                                  | -                                    | -       |
| Prostatectomy    | 9 (3)                       | -                                  | 47 (21)                     | -                                  | -                                    | -       |
| AAA repair       | 3 (3)                       | -                                  | 25 (18)                     | -                                  | -                                    | -       |
| Cystectomy       | 0 (0)                       | -                                  | 5 (5)                       | -                                  | -                                    | -       |
| Hysterectomy     | 1 (1)                       | -                                  | 1 (1)                       | -                                  | -                                    | -       |
| Thyroidectomy    | 1 (1)                       | -                                  | 3 (3)                       | -                                  | -                                    | -       |
| Liver            | 0 (0)                       | -                                  | 3 (3)                       | -                                  | -                                    | -       |

**B. 30-day postoperative mortality among Hispanic patients**

| Procedure        | Concordance                 |                                    | Discordance                 |                                    | Adjusted risk difference, pp (95%CI) | p-value |
|------------------|-----------------------------|------------------------------------|-----------------------------|------------------------------------|--------------------------------------|---------|
|                  | No. patients (No. surgeons) | Adjusted mortality rate, % (95%CI) | No. patients (No. surgeons) | Adjusted mortality rate, % (95%CI) |                                      |         |
| Knee replacement | 317 (20)                    | 0.3 (0 to 0.9)                     | 1340 (164)                  | 0.1 (0 to 0.2)                     | +0.2 (-0.3 to +0.8)                  | 0.38    |
| Hip replacement  | 97 (23)                     | 0.3 (0 to 3.3)                     | 548 (149)                   | 1.6 (0.5 to 2.7)                   | -1.3 (-4.8 to +2.3)                  | 0.48    |
| Laminectomy      | 100 (10)                    | 0 (0 to 0.5)                       | 388 (86)                    | 0.7 (0 to 1.8)                     | -1.6 (-4.0 to +0.7)                  | 0.17    |
| Cholecystectomy  | 94 (31)                     | 0 (0 to 1.3)                       | 386 (143)                   | 1.6 (0.3 to 2.9)                   | -1.8 (-3.9 to +0.4)                  | 0.11    |
| Colectomy        | 55 (29)                     | 4.9 (0 to 13.4)                    | 257 (107)                   | 10.2 (6.7 to 13.8)                 | -5.3 (-15.1 to +4.5)                 | 0.29    |
| CABG             | 32 (5)                      | 0.6 (0 to 8.3)                     | 154 (38)                    | 3.8 (0.2 to 7.3)                   | -3.1 (-12.9 to +6.6)                 | 0.52    |
| Lobectomy        | 1 (1)                       | -                                  | 71 (21)                     | -                                  | -                                    | -       |
| Appendectomy     | 23 (15)                     | 2.4 (0 to 17.9)                    | 98 (66)                     | 6.6 (1.5 to 11.6)                  | -4.2 (-22.1 to +13.8)                | 0.65    |
| Prostatectomy    | 17 (4)                      | 0 (0 to 8.2)                       | 87 (40)                     | 2.4 (0 to 6.4)                     | -2.9 (-14.1 to +8.4)                 | 0.61    |
| AAA repair       | 9 (3)                       | -                                  | 36 (25)                     | -                                  | -                                    | -       |
| Cystectomy       | 0 (0)                       | -                                  | 3 (3)                       | -                                  | -                                    | -       |
| Hysterectomy     | 7 (2)                       | -                                  | 7 (7)                       | -                                  | -                                    | -       |
| Thyroidectomy    | 0 (0)                       | -                                  | 10 (6)                      | -                                  | -                                    | -       |
| Liver            | 3 (2)                       | -                                  | 6 (5)                       | -                                  | -                                    | -       |

**C. 30-day postoperative readmissions among Black patients**

| Procedure        | Concordance                 |                                      | Discordance                 |                                      |                                      | p-value |
|------------------|-----------------------------|--------------------------------------|-----------------------------|--------------------------------------|--------------------------------------|---------|
|                  | No. patients (No. surgeons) | Adjusted readmission rate, % (95%CI) | No. patients (No. surgeons) | Adjusted readmission rate, % (95%CI) | Adjusted risk difference, pp (95%CI) |         |
| Knee replacement | 45 (7)                      | 14.2 (3.3 to 25.1)                   | 617 (108)                   | 5.8 (3.9 to 7.6)                     | +8.4 (-2.7 to +19.6)                 | 0.14    |
| Hip replacement  | 43 (8)                      | 7.0 (0 to 17.5)                      | 325 (100)                   | 5.5 (3.0 to 8.0)                     | +1.5 (-9.8 to +12.8)                 | 0.79    |
| Laminectomy      | 30 (6)                      | 9.3 (0 to 23.4)                      | 267 (67)                    | 9.8 (6.1 to 13.6)                    | -0.6 (-15.8 to +14.7)                | 0.94    |
| Cholecystectomy  | 20 (10)                     | 25.2 (7.9 to 42.6)                   | 98 (70)                     | 7.1 (1.8 to 12.3)                    | +18.1 (-0.7 to +36.9)                | 0.06    |
| Colectomy        | 39 (10)                     | 2.7 (0 to 18.4)                      | 85 (56)                     | 12.9 (3.7 to 22.0)                   | -10.2 (-32.1 to +11.7)               | 0.35    |
| CABG             | 11 (3)                      | 62.9 (18.1 to 107.7)                 | 68 (29)                     | 4.5 (0 to 14.1)                      | +58.4 (+7.6 to +109.3)               | 0.03    |
| Lobectomy        | 13 (3)                      | 14.0 (0 to 74.1)                     | 64 (17)                     | 8.1 (0 to 22.5)                      | +6.0 (-65.2 to +77.1)                | 0.86    |
| Appendectomy     | 7 (6)                       | -                                    | 28 (25)                     | -                                    | -                                    | -       |
| Prostatectomy    | 9 (3)                       | -                                    | 47 (21)                     | -                                    | -                                    | -       |
| AAA repair       | 3 (3)                       | -                                    | 25 (18)                     | -                                    | -                                    | -       |
| Cystectomy       | 0 (0)                       | -                                    | 5 (5)                       | -                                    | -                                    | -       |
| Hysterectomy     | 1 (1)                       | -                                    | 1 (1)                       | -                                    | -                                    | -       |
| Thyroidectomy    | 1 (1)                       | -                                    | 3 (3)                       | -                                    | -                                    | -       |
| Liver            | 0 (0)                       | -                                    | 3 (3)                       | -                                    | -                                    | -       |

**D. 30-day postoperative readmissions among Hispanic patients**

| Procedure        | Concordance                 |                                      | Discordance                 |                                      |                                      | p-value |
|------------------|-----------------------------|--------------------------------------|-----------------------------|--------------------------------------|--------------------------------------|---------|
|                  | No. patients (No. surgeons) | Adjusted readmission rate, % (95%CI) | No. patients (No. surgeons) | Adjusted readmission rate, % (95%CI) | Adjusted risk difference, pp (95%CI) |         |
| Knee replacement | 317 (20)                    | 1.9 (0 to 3.8)                       | 1340 (164)                  | 4.4 (3.3 to 5.5)                     | -2.5 (-4.9 to -0.2)                  | 0.04    |
| Hip replacement  | 97 (23)                     | 5.6 (0 to 11.5)                      | 547 (148)                   | 6.3 (4.2 to 8.4)                     | -0.8 (-7.5 to +5.9)                  | 0.82    |
| Laminectomy      | 100 (10)                    | 4.4 (0 to 11.0)                      | 388 (86)                    | 8.9 (5.9 to 11.9)                    | -4.6 (-12.6 to +3.5)                 | 0.27    |
| Cholecystectomy  | 94 (31)                     | 7.6 (1.7 to 13.6)                    | 384 (142)                   | 6.7 (4.1 to 9.3)                     | +0.9 (-6.0 to +7.8)                  | 0.80    |
| Colectomy        | 55 (29)                     | 4.5 (0 to 13.5)                      | 256 (107)                   | 12.3 (7.9 to 16.7)                   | -7.8 (-18.6 to +3.0)                 | 0.15    |
| CABG             | 32 (5)                      | 6.3 (0 to 24.7)                      | 154 (38)                    | 13.0 (6.4 to 19.5)                   | -6.7 (-29.0 to +15.7)                | 0.56    |
| Lobectomy        | 1 (1)                       | 0 (0 to 109.1)                       | 71 (21)                     | 7.8 (0.4 to 15.2)                    | -61.7 (-225.1 to +101.6)             | 0.42    |
| Appendectomy     | 23 (15)                     | 7.3 (0 to 19.1)                      | 97 (65)                     | 4.5 (0 to 9.1)                       | +2.9 (-10.5 to +16.2)                | 0.67    |
| Prostatectomy    | 17 (4)                      | 9.4 (7.1 to 11.7)                    | 87 (40)                     | 2.0 (0 to 10.2)                      | +7.4 (-1.6 to +16.3)                 | 0.11    |
| AAA repair       | 9 (3)                       | -                                    | 36 (25)                     | -                                    | -                                    | -       |
| Cystectomy       | 0 (0)                       | -                                    | 3 (3)                       | -                                    | -                                    | -       |
| Hysterectomy     | 7 (2)                       | -                                    | 7 (7)                       | -                                    | -                                    | -       |
| Thyroidectomy    | 0 (0)                       | -                                    | 10 (6)                      | -                                    | -                                    | -       |
| Liver            | 3 (2)                       | -                                    | 6 (5)                       | -                                    | -                                    | -       |

**E. Length of stay among Black patients**

| Procedure        | Concordance                 |                         | Discordance                 |                         | Adjusted difference, d (95%CI) | p-value |
|------------------|-----------------------------|-------------------------|-----------------------------|-------------------------|--------------------------------|---------|
|                  | No. patients (No. surgeons) | Adjusted LOS, d (95%CI) | No. patients (No. surgeons) | Adjusted LOS, d (95%CI) |                                |         |
| Knee replacement | 45 (7)                      | 4.4 (3.2 to 5.7)        | 617 (108)                   | 2.9 (2.7 to 3.1)        | +1.5 (+0.2 to +2.8)            | 0.02    |
| Hip replacement  | 43 (8)                      | 4.1 (2.5 to 5.6)        | 325 (100)                   | 3.6 (3.2 to 4.0)        | +0.5 (-1.2 to +2.2)            | 0.58    |
| Laminectomy      | 30 (6)                      | 4.6 (2.0 to 7.2)        | 267 (67)                    | 5.9 (5.1 to 6.7)        | -1.3 (-4.2 to +1.6)            | 0.37    |
| Cholecystectomy  | 20 (10)                     | 3.4 (0 to 8.3)          | 98 (70)                     | 8.5 (6.4 to 10.5)       | -5.0 (-11.1 to +1.0)           | 0.10    |
| Colectomy        | 39 (10)                     | 13.7 (6.3 to 21.1)      | 85 (56)                     | 6.6 (4.0 to 9.1)        | +7.1 (-1.9 to +16.1)           | 0.12    |
| CABG             | 11 (3)                      | 10.7 (0 to 26.3)        | 68 (29)                     | 12.1 (8.1 to 16.0)      | -1.4 (-20.0 to +17.2)          | 0.88    |
| Lobectomy        | 13 (3)                      | 7.7 (0.7 to 14.7)       | 64 (17)                     | 7.2 (5.3 to 9.2)        | +0.5 (-8.1 to +9.1)            | 0.91    |
| Appendectomy     | 7 (6)                       | -                       | 28 (25)                     | -                       | -                              | -       |
| Prostatectomy    | 9 (3)                       | -                       | 47 (21)                     | -                       | -                              | -       |
| AAA repair       | 3 (3)                       | -                       | 25 (18)                     | -                       | -                              | -       |
| Cystectomy       | 0 (0)                       | -                       | 5 (5)                       | -                       | -                              | -       |
| Hysterectomy     | 1 (1)                       | -                       | 1 (1)                       | -                       | -                              | -       |
| Thyroidectomy    | 1 (1)                       | -                       | 2 (2)                       | -                       | -                              | -       |
| Liver            | 0 (0)                       | -                       | 3 (3)                       | -                       | -                              | -       |

**F. Length of stay among Hispanic patients**

| Procedure        | Concordance                 |                         | Discordance                 |                         | Adjusted difference, d (95%CI) | p-value |
|------------------|-----------------------------|-------------------------|-----------------------------|-------------------------|--------------------------------|---------|
|                  | No. patients (No. surgeons) | Adjusted LOS, d (95%CI) | No. patients (No. surgeons) | Adjusted LOS, d (95%CI) |                                |         |
| Knee replacement | 317 (20)                    | 2.8 (2.6 to 3.0)        | 1340 (164)                  | 2.8 (2.7 to 2.9)        | 0.0 (-0.2 to +0.2)             | 0.90    |
| Hip replacement  | 97 (23)                     | 5.3 (4.1 to 6.5)        | 548 (149)                   | 4.2 (3.8 to 4.6)        | +1.1 (-0.1 to +2.3)            | 0.06    |
| Laminectomy      | 100 (10)                    | 4.5 (2.9 to 6.1)        | 388 (86)                    | 6.1 (5.5 to 6.8)        | -1.6 (-3.5 to +0.3)            | 0.09    |
| Cholecystectomy  | 93 (30)                     | 4.7 (3.7 to 5.7)        | 385 (143)                   | 5.1 (4.6 to 5.6)        | -0.4 (-1.6 to +0.8)            | 0.53    |
| Colectomy        | 54 (29)                     | 6.3 (4.5 to 8.1)        | 257 (107)                   | 8.2 (7.3 to 9.1)        | -1.9 (-4.0 to +0.2)            | 0.08    |
| CABG             | 32 (5)                      | 11.3 (7.4 to 15.2)      | 154 (38)                    | 9.7 (8.4 to 11.1)       | +1.6 (-2.8 to +6.0)            | 0.48    |
| Lobectomy        | 1 (1)                       | 19.9 (0 to 49.6)        | 71 (21)                     | 5.6 (4.3 to 6.8)        | +14.4 (-15.6 to +44.4)         | 0.31    |
| Appendectomy     | 23 (15)                     | 5.6 (3.3 to 7.8)        | 98 (66)                     | 4.8 (3.9 to 5.7)        | +0.7 (-1.8 to +3.3)            | 0.57    |
| Prostatectomy    | 17 (4)                      | 2.4 (0.5 to 4.2)        | 87 (40)                     | 3.3 (2.7 to 4.0)        | -0.9 (-3.1 to +1.2)            | 0.38    |
| AAA repair       | 9 (3)                       | -                       | 36 (25)                     | -                       | -                              | -       |
| Cystectomy       | 0 (0)                       | -                       | 3 (3)                       | -                       | -                              | -       |
| Hysterectomy     | 7 (2)                       | -                       | 7 (7)                       | -                       | -                              | -       |
| Thyroidectomy    | 0 (0)                       | -                       | 10 (6)                      | -                       | -                              | -       |
| Liver            | 3 (2)                       | -                       | 6 (5)                       | -                       | -                              | -       |

Stratified analysis by procedure shows the association of patient-surgeon racial and ethnic concordance with adjusted 30-day post-operative mortality (A,B), 30-day post-operative readmission (C,D), and length of stay (E,F) among Black and Hispanic patients following 14 common procedures (abdominal aortic aneurysm repair, appendectomy, coronary artery bypass grafting, cholecystectomy, cystectomy, hip replacement, hysterectomy, knee replacement, laminectomy, liver resection, lung resection, prostatectomy, and thyroidectomy) using Medicare data from 2016-2019, calculated using marginal standardization from linear probability models, controlling for patient (age, sex, race and ethnicity, 27 chronic conditions, median household income, dual-eligibility for Medicaid) procedure (weekend surgery, electiveness of surgery, month, year), surgeon (age, sex, procedure volume), and hospital (size, teaching, urban/rural, and ownership status) characteristics. Abbreviations: AAA, abdominal aortic aneurysm; CABG, coronary artery bypass grafting. Separate regressions were performed for each surgical procedure; due to small sample sizes for certain operations, the model did not

converge and we are unable to report adjusted mortality rate for those individual procedures. Estimated adjusted outcome lower bound set at 0.  
Abbreviations: d, day; LOS, length of stay.; pp, percentage point.

**eTable 11.** The effect of patient-surgeon racial and ethnic concordance on outcomes among Black and Hispanic patients, stratified by high versus low morbidity procedures**A. 30-day postoperative mortality among Black patients**

| Procedure Morbidity | No. patients | Concordance                        |                                    | Discordance                          |  | p-value |
|---------------------|--------------|------------------------------------|------------------------------------|--------------------------------------|--|---------|
|                     |              | Adjusted mortality rate, % (95%CI) | Adjusted mortality rate, % (95%CI) | Adjusted risk difference, pp (95%CI) |  |         |
| High                | 527          | 2.0 (0 to 6.1)                     | 0.1 (0 to 0.4)                     | -1.1 (-6.0 to +3.9)                  |  | 0.67    |
| Low                 | 1331         | 0.5 (0 to 2.7)                     | 0.7 (0.2 to 1.2)                   | -0.2 (-2.6 to +2.2)                  |  | 0.87    |

**B. 30-day postoperative mortality among Hispanic patients**

| Procedure Morbidity | No. patients | Concordance                        |                                    | Discordance                          |  | p-value |
|---------------------|--------------|------------------------------------|------------------------------------|--------------------------------------|--|---------|
|                     |              | Adjusted mortality rate, % (95%CI) | Adjusted mortality rate, % (95%CI) | Adjusted risk difference, pp (95%CI) |  |         |
| High                | 1346         | 3.2 (0.7 to 5.6)                   | 4.3 (3.1 to 5.5)                   | -1.1 (-3.9 to +1.7)                  |  | 0.44    |
| Low                 | 2800         | 0.4 (0 to 1.1)                     | 0.5 (0.2 to 0.8)                   | -0.1 (-0.9 to +0.7)                  |  | 0.79    |

**C. 30-day postoperative readmission among Black patients**

| Procedure Morbidity | No. patients | Concordance                        |                                    | Discordance                          |  | p-value |
|---------------------|--------------|------------------------------------|------------------------------------|--------------------------------------|--|---------|
|                     |              | Adjusted mortality rate, % (95%CI) | Adjusted mortality rate, % (95%CI) | Adjusted risk difference, pp (95%CI) |  |         |
| High                | 527          | 13.6 (6.4 to 20.9)                 | 8.7 (5.9 to 11.5)                  | +4.9 (-3.1 to +3.0)                  |  | 0.23    |
| Low                 | 1331         | 8.8 (3.2 to 14.4)                  | 6.7 (5.3 to 8.1)                   | +2.1 (-3.8 to +7.9)                  |  | 0.49    |

**D. 30-day postoperative readmission among Hispanic patients**

| Procedure Morbidity | No. patients | Concordance                        |                                    | Discordance                          |  | p-value |
|---------------------|--------------|------------------------------------|------------------------------------|--------------------------------------|--|---------|
|                     |              | Adjusted mortality rate, % (95%CI) | Adjusted mortality rate, % (95%CI) | Adjusted risk difference, pp (95%CI) |  |         |
| High                | 1342         | 6.3 (2.9 to 9.7)                   | 8.7 (7.0 to 10.4)                  | -2.4 (-6.3 to +1.5)                  |  | 0.28    |
| Low                 | 2799         | 3.2 (1.4 to 5.0)                   | 5.6 (4.6 to 6.5)                   | -2.4 (-4.6 to -0.3)                  |  | 0.029   |

**E. Length of stay among Black patients**

| Procedure Morbidity | No. patients | Concordance             |                         | Discordance                    |  | p-value |
|---------------------|--------------|-------------------------|-------------------------|--------------------------------|--|---------|
|                     |              | Adjusted LOS, d (95%CI) | Adjusted LOS, d (95%CI) | Adjusted difference, d (95%CI) |  |         |
| High                | 527          | 8.8 (5.8 to 11.8)       | 8.4 (7.6 to 9.3)        | +0.4 (-2.9 to +3.6)            |  | 0.83    |
| Low                 | 1330         | 4.2 (3.2 to 5.2)        | 3.8 (3.5 to 4.0)        | +0.4 (-0.6 to +1.5)            |  | 0.43    |

**F. Length of stay among Hispanic patients**

| Procedure Morbidity | No. patients | Concordance             |                         | Discordance                    |  | p-value |
|---------------------|--------------|-------------------------|-------------------------|--------------------------------|--|---------|
|                     |              | Adjusted LOS, d (95%CI) | Adjusted LOS, d (95%CI) | Adjusted difference, d (95%CI) |  |         |
| High                | 1343         | 5.5 (4.8 to 6.1)        | 6.4 (4.8 to 6.1)        | -0.9 (-1.7 to -0.1)            |  | 0.027   |
| Low                 | 2800         | 3.5 (3.2 to 3.8)        | 3.7 (3.6 to 3.9)        | -0.2 (-0.6 to +0.1)            |  | 0.16    |

Stratified analysis by procedure morbidity (high v low) shows the association of patient-surgeon racial and ethnic concordance with adjusted 30-day post-operative mortality (A,B), 30-day post-operative readmission (C,D), and length of stay (E,F) among Black and Hispanic patients. High morbidity



procedures include abdominal aortic aneurysm repair, appendectomy, coronary artery bypass grafting, cholecystectomy, cystectomy, hysterectomy, liver resection, lung resection, and prostatectomy; low morbidity procedures include hip replacement, knee replacement, laminectomy and thyroidectomy. Using Medicare data from 2016-2019, calculated using marginal standardization from linear probability models, controlling for patient (age, sex, race and ethnicity, 27 chronic conditions, median household income, dual-eligibility for Medicaid) procedure (weekend surgery, electiveness of surgery, month, year), surgeon (age, sex, procedure volume), and hospital (size, teaching, urban/rural, and ownership status) characteristics. Separate regressions were performed for each surgical procedure morbidity class. Estimated adjusted outcome lower bound set at 0. Abbreviations: d, day; LOS, length of stay.; pp, percentage point.

**eTable 12.** Baseline characteristics of White patients, according to patient-surgeon racial and ethnic concordance

| Characteristic                          | White patients             |                            | p- value |
|-----------------------------------------|----------------------------|----------------------------|----------|
|                                         | Concordant patient-surgeon | Discordant patient-surgeon |          |
| <b>Total= 39,543</b>                    |                            |                            |          |
| <b>Patients, No. (%)</b>                | 34,505 (87.3)              | 5,038 (12.7)               | NA       |
| <b>Patient characteristics</b>          |                            |                            |          |
| Patient age, y, mean (SD)               | 75.2 (6.8)                 | 75.4 (7.0)                 | 0.48     |
| Patient sex                             |                            |                            |          |
| Male                                    | 15,166 (44.0)              | 2,326 (46.2)               | 0.0031   |
| Female                                  | 19,339 (56.1)              | 2,712 (53.8)               |          |
| Dual Medicare Medicaid                  | 2,691 (7.8)                | 522 (10.4)                 | <0.001   |
| Median household income*, \$, mean (SD) | 83,384 (34308.4)           | 72,501 (29540.0)           | <0.001   |
| Coexisting conditions                   |                            |                            |          |
| Congestive heart failure                | 8,182 (23.7)               | 1,402 (27.8)               | <0.001   |
| Chronic obstructive pulmonary disease   | 8,206 (23.8)               | 1,356 (26.9)               | <0.001   |
| Diabetes                                | 11,159 (32.3)              | 1,910 (37.9)               | <0.001   |
| Chronic kidney disease                  | 10,785 (31.3)              | 1,780 (35.3)               | <0.001   |
| Neurological disorders                  | 6,552 (19.0)               | 1,112 (22.1)               | <0.001   |
| Cancer                                  | 7,609 (22.1)               | 1,076 (21.4)               | 0.27     |
| <b>Surgeon characteristics</b>          |                            |                            |          |
| Surgeon age, y, mean (SD)               | 52.8 (10.9)                | 49.4 (10.5)                | <0.001   |
| Surgeon Gender                          |                            |                            |          |
| Male                                    | 687 (90.5)                 | 147 (87.0)                 | 0.17     |
| Female                                  | 72 (9.5)                   | 22 (13.0)                  |          |
| Surgical volume (tertiles)              |                            |                            |          |
| 1 (Lowest)                              | 1,045 (3.0)                | 200 (4.0)                  | <0.001   |
| 2                                       | 6,647 (19.3)               | 1,036 (20.6)               |          |
| 3 (Highest)                             | 26,813 (77.7)              | 3,802 (75.5)               |          |
| <b>Hospital Characteristics</b>         |                            |                            |          |
| Hospital size, beds                     |                            |                            |          |
| ≤399                                    | 24,765 (71.8)              | 2,603 (51.7)               | <0.001   |
| >399                                    | 9,740 (28.2)               | 2,435 (48.3)               |          |
| Teaching hospital                       |                            |                            |          |
| Yes                                     | 20,240 (58.7)              | 3,111 (61.8)               | <0.001   |
| No                                      | 14,265 (41.3)              | 1,927 (38.3)               |          |
| Hospital ownership                      |                            |                            |          |
| For-profit                              | 5,271 (15.3)               | 624 (12.4)                 | <0.001   |
| Not-for-profit                          | 25,010 (72.5)              | 3,416 (67.8)               |          |
| Public                                  | 4,224 (12.2)               | 998 (19.8)                 |          |

|            |               |              |        |
|------------|---------------|--------------|--------|
| Urban area |               |              |        |
| Yes        | 34,130 (98.9) | 5,032 (99.9) | <0.001 |
| No         | 375 (1.1)     | 6 (0.1)      |        |

\*Median household income is estimated from the beneficiary's zip code of residency. Medicare data from 2016-2019.

**eTable 13.** Association of patient-surgeon racial and ethnic concordance with postoperative outcomes among White patients

|                                                 | White patients       |                      | White patients<br>Adjusted risk<br>difference, pp<br>(95%CI) | p-<br>value |
|-------------------------------------------------|----------------------|----------------------|--------------------------------------------------------------|-------------|
|                                                 | Concordant           | Discordant           |                                                              |             |
| <b>Adjusted mortality rate,<br/>% (95%CI)</b>   | 1.6<br>(1.4 to 1.7)  | 1.5<br>(1.1 to 1.9)  | +0.1<br>(-0.3 to +0.5)                                       | 0.67        |
| <b>Adjusted readmission rate,<br/>% (95%CI)</b> | 6.5<br>(6.2 to 6.8)  | 7.1<br>(6.4 to 7.9)  | -0.6<br>(-1.4 to +0.2)                                       | 0.13        |
| <b>Adjusted LOS,<br/>days (95%CI)</b>           | 4.3*<br>(4.3 to 4.4) | 4.2*<br>(4.1 to 4.4) | +0.1*<br>(-0.05 to +0.3)                                     | 0.16        |

Association between patient-surgeon racial and ethnic concordance and 30-day mortality, 30-day readmissions, and length of stay among White patients using Medicare data from 2016-2019 calculated using marginal standardization from generalized linear probability models, controlling for patient (age, sex, 27 chronic conditions, median household income, dual-eligibility for Medicaid) procedure (procedure type, weekend surgery, electiveness of surgery, month, year), surgeon (age, sex, procedure volume), and hospital (size, teaching, urban/rural, and ownership status) characteristics. Abbreviations: d, day; LOS, length of stay. \*unit: adjusted days

**eFigure 1:** Association of patient-surgeon racial and ethnic concordance with postoperative outcomes among White patients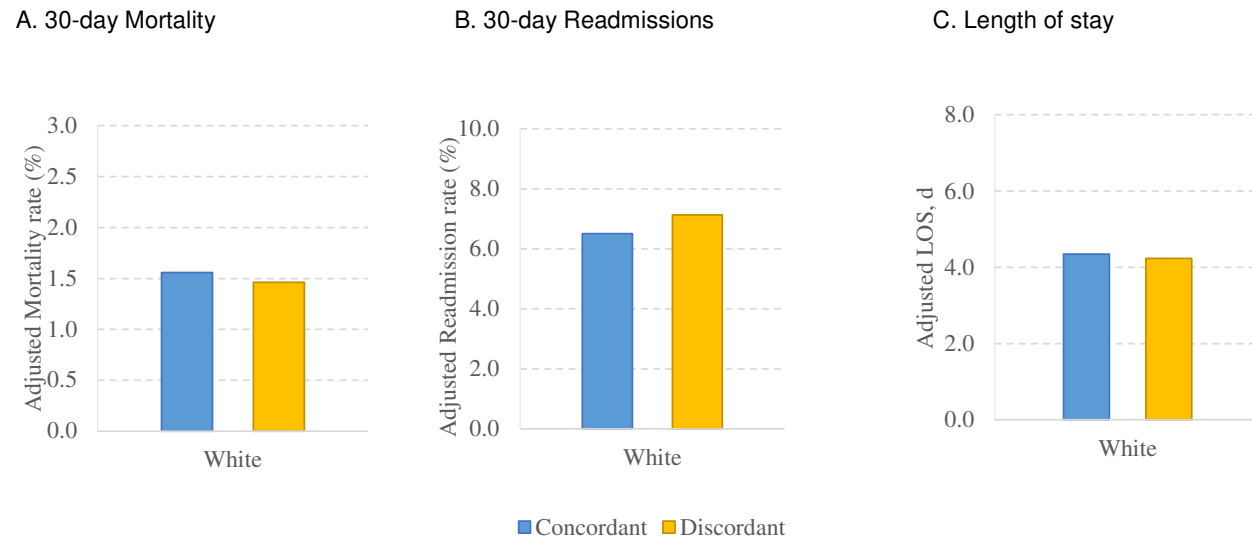

Association between patient-surgeon racial and ethnic concordance and 30-day mortality, 30-day readmissions, and length of stay among White patients using Medicare data from 2016-2019 calculated using marginal standardization from generalized linear probability models, controlling for patient (age, sex, 27 chronic conditions, median household income, dual-eligibility for Medicaid) procedure (procedure type, weekend surgery, electiveness of surgery, month, year), surgeon (age, sex, procedure volume), and hospital (size, teaching, urban/rural, and ownership status) characteristics. Abbreviations: d, day; LOS, length of stay.

**eFigure 2:** Subgroup analysis of postoperative outcomes by patient and procedure characteristics among White patients  
**A. 30-day postoperative mortality**

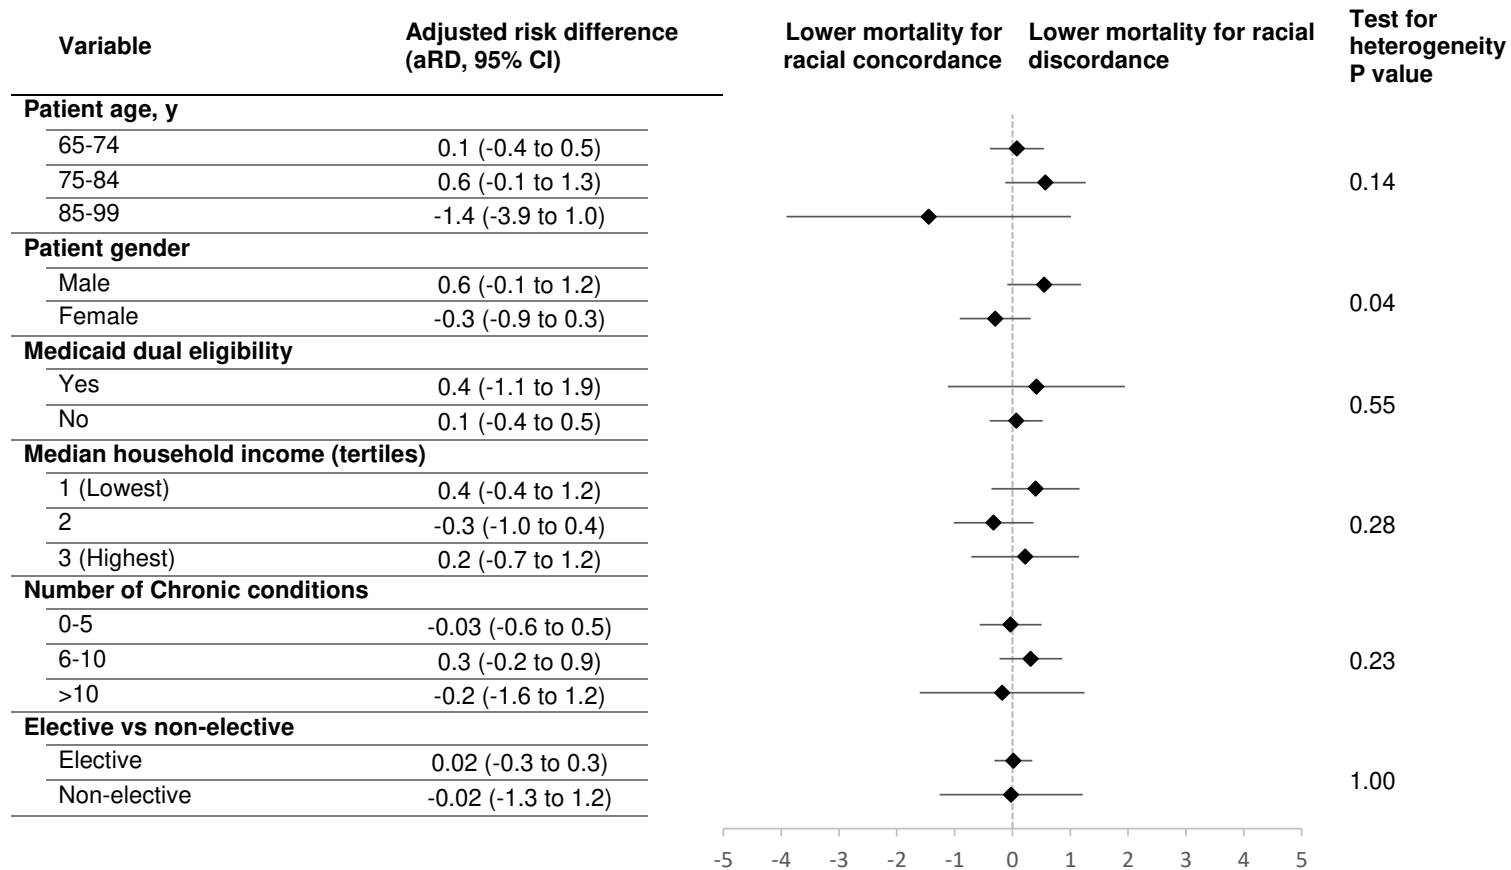

## B. 30-day postoperative readmissions

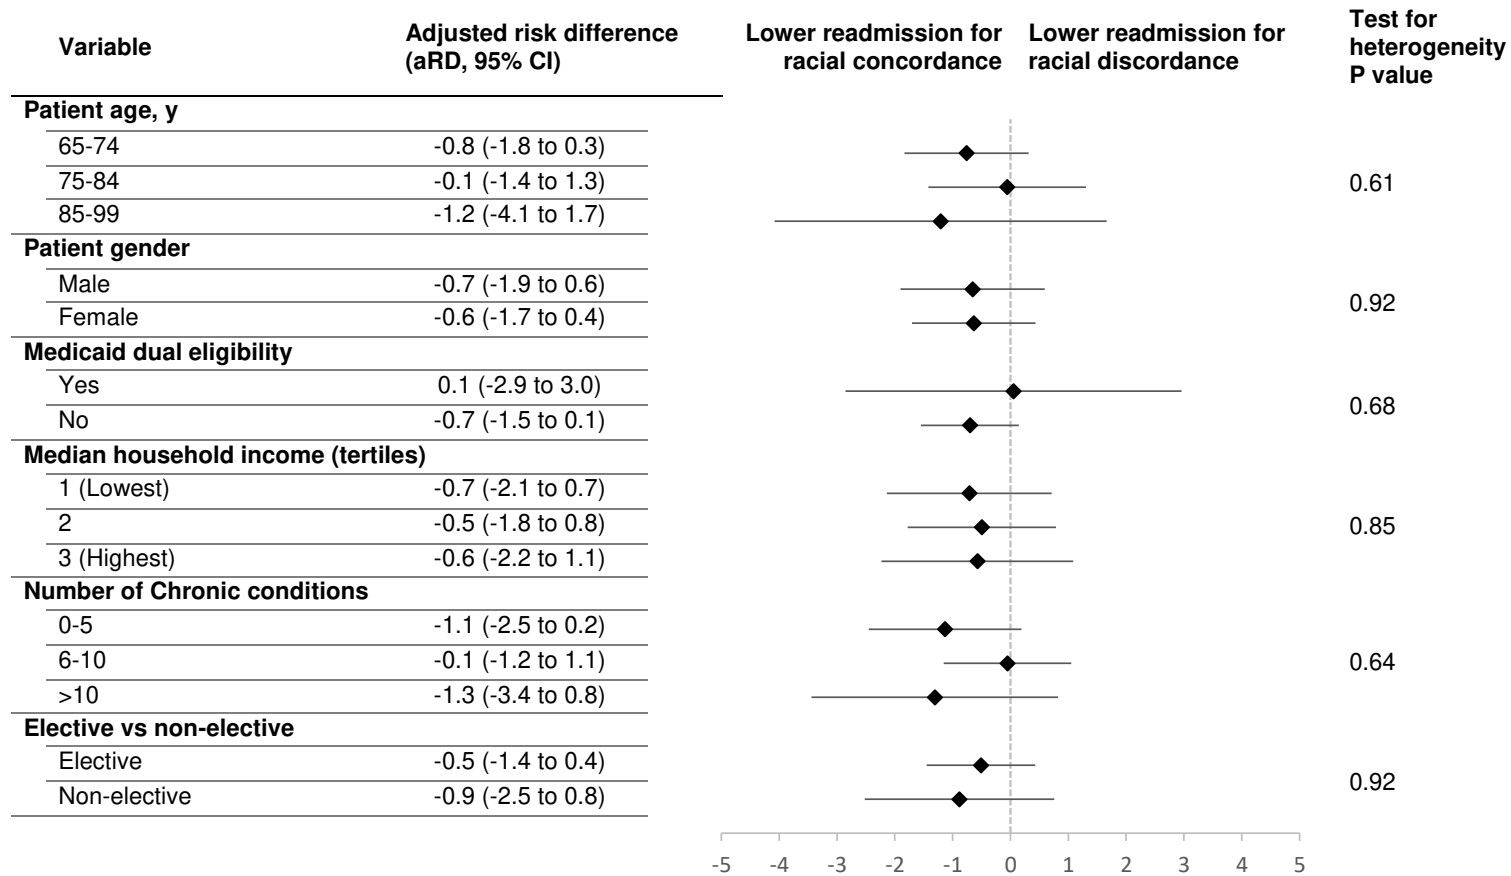

## C. Length of stay

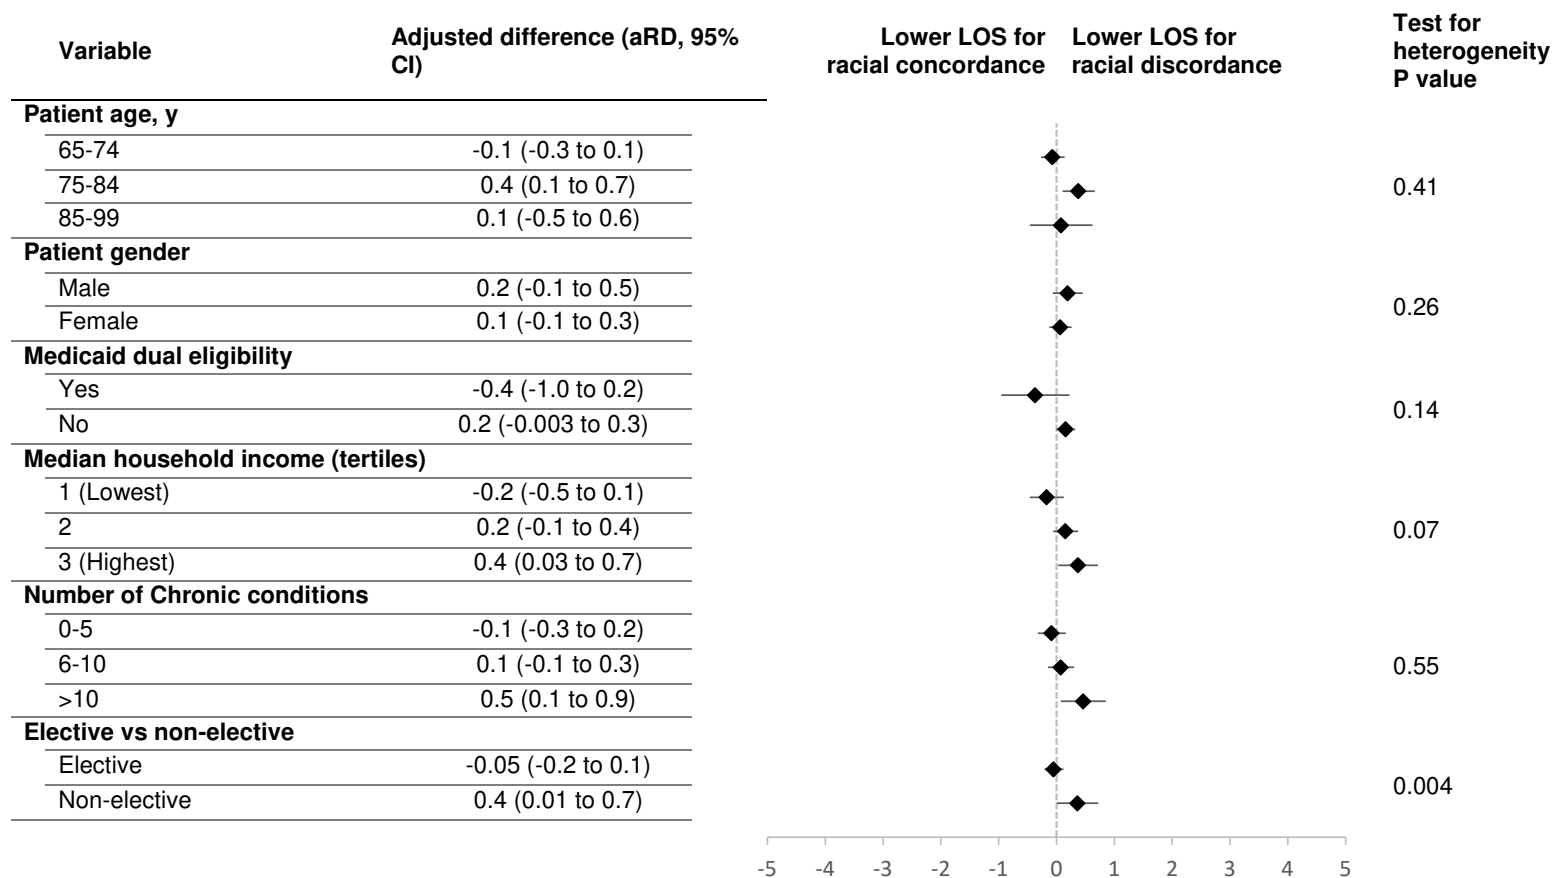

Subgroup analysis shows the associations between patient-surgeon racial and ethnic concordance and outcomes 30-day postoperative mortality (A), 30-day postoperative readmissions (B), and length of stay (C) using Medicare data from 2016-2019 by patient characteristics (age, gender, Medicaid dual eligibility, median household income estimated from beneficiary zip codes, number of chronic conditions) and procedure characteristics (elective versus non-elective). Diamonds represent point estimates for the adjusted outcomes for White patients following 14 common procedures (abdominal aortic aneurysm repair, appendectomy, coronary artery bypass grafting, cholecystectomy, cystectomy, hip replacement, hysterectomy, knee replacement, laminectomy, liver resection, lung resection, prostatectomy, and thyroidectomy), calculated using marginal standardization from linear probability models, controlling for patient (age, sex, 27 chronic conditions, median household income, dual-eligibility for Medicaid) procedure (procedure type, weekend surgery, electiveness of surgery, month, year), surgeon (age, sex, procedure volume), and hospital (size, teaching, urban/rural, and ownership status) characteristics. Horizontal lines indicate the associated 95% confidence intervals. Abbreviations: aRD, adjusted risk difference; CI, confidence interval; LOS, length of stay; y, year.



**eTable 14.** The effect of patient-surgeon racial and ethnic concordance on outcomes among White patients, stratified by procedure**A. 30-day mortality**

| Procedure        | Concordance                 |                                    | Discordance                 |                                    |                                      |         |
|------------------|-----------------------------|------------------------------------|-----------------------------|------------------------------------|--------------------------------------|---------|
|                  | No. patients (No. surgeons) | Adjusted mortality rate, % (95%CI) | No. patients (No. surgeons) | Adjusted mortality rate, % (95%CI) | Adjusted risk difference, pp (95%CI) | p-value |
| Knee replacement | 10317 (204)                 | 0.2 (0.1 to 0.3)                   | 984 (31)                    | 0.1 (0 to 0.4)                     | +0.1 (-0.2 to +0.5)                  | 0.48    |
| Hip replacement  | 10213 (240)                 | 1.5 (1.2 to 1.7)                   | 1411 (40)                   | 1.6 (0.8 to 2.4)                   | -0.1 (-1.0 to +0.7)                  | 0.78    |
| Laminectomy      | 5016 (115)                  | 1.0 (0.7 to 1.3)                   | 730 (24)                    | 0.2 (0 to 1.0)                     | +0.8 (-0.1 to +1.8)                  | 0.09    |
| Cholecystectomy  | 1878 (209)                  | 1.5 (0.9 to 2.0)                   | 424 (66)                    | 2.9 (1.3 to 4.5)                   | -1.4 (-3.1 to +0.3)                  | 0.10    |
| Colectomy        | 2181 (208)                  | 5.8 (4.8 to 6.7)                   | 414 (58)                    | 6.5 (4.0 to 9.1)                   | -0.8 (-3.6 to +2.1)                  | 0.60    |
| CABG             | 1581 (53)                   | 3.7 (2.7 to 4.6)                   | 673 (11)                    | 3.0 (1.5 to 4.4)                   | +0.7 (-1.1 to +2.5)                  | 0.47    |
| Lobectomy        | 1325 (50)                   | 2.6 (1.7 to 3.4)                   | 86 (15)                     | 0 (0 to 2.2)                       | +3.5 (-0.03 to +7.0)                 | 0.05    |
| Appendectomy     | 721 (166)                   | 2.3 (1.2 to 3.5)                   | 128 (45)                    | 4.7 (1.0 to 8.5)                   | -2.4 (-6.4 to +1.6)                  | 0.24    |
| Prostatectomy    | 636 (79)                    | 0.8 (0.1 to 1.5)                   | 53 (12)                     | 0 (0 to 1.5)                       | +0.8 (-1.0 to +2.7)                  | 0.38    |
| AAA repair       | 431 (60)                    | 6.0 (3.8 to 8.2)                   | 106 (14)                    | 4.9 (0.2 to 9.6)                   | +1.1 (-4.3 to +6.4)                  | 0.69    |
| Cystectomy       | 96 (23)                     | -                                  | 8 (3)                       | -                                  | -                                    | -       |
| Hysterectomy     | 46 (29)                     | -                                  | 7 (6)                       | -                                  | -                                    | -       |
| Thyroidectomy    | 42 (23)                     | -                                  | 2 (2)                       | -                                  | -                                    | -       |
| Liver            | 22 (9)                      | -                                  | 12 (5)                      | -                                  | -                                    | -       |

**B. 30-day readmissions**

| Procedure        | Concordance                 |                                    | Discordance                 |                                    |                                      |         |
|------------------|-----------------------------|------------------------------------|-----------------------------|------------------------------------|--------------------------------------|---------|
|                  | No. patients (No. surgeons) | Adjusted mortality rate, % (95%CI) | No. patients (No. surgeons) | Adjusted mortality rate, % (95%CI) | Adjusted risk difference, pp (95%CI) | p-value |
| Knee replacement | 10315 (204)                 | 4.2 (3.8 to 4.5)                   | 984 (31)                    | 5.2 (3.8 to 6.7)                   | -1.1 (-2.6 to +0.5)                  | 0.18    |
| Hip replacement  | 10198 (239)                 | 5.8 (5.4 to 6.3)                   | 1410 (40)                   | 7.1 (5.7 to 8.5)                   | -1.3 (-2.8 to +0.2)                  | 0.09    |
| Laminectomy      | 5009 (115)                  | 7.7 (7.0 to 8.5)                   | 727 (24)                    | 7.5 (5.3 to 9.8)                   | +0.2 (-2.2 to +2.6)                  | 0.87    |
| Cholecystectomy  | 1871 (209)                  | 7.8 (6.6 to 9.0)                   | 423 (66)                    | 9.2 (6.3 to 12.1)                  | -1.4 (-4.6 to +1.8)                  | 0.40    |
| Colectomy        | 2171 (207)                  | 10.6 (9.3 to 11.9)                 | 413 (57)                    | 8.9 (5.9 to 11.9)                  | +1.7 (-1.7 to +5.1)                  | 0.33    |

|               |           |                     |          |                    |                        |      |
|---------------|-----------|---------------------|----------|--------------------|------------------------|------|
| CABG          | 1577 (53) | 8.4 (7.0 to 9.8)    | 673 (11) | 11.4 (8.7 to 14.0) | -3.0 (-6.1 to +0.2)    | 0.07 |
| Lobectomy     | 1325 (50) | 7.8 (6.4 to 9.3)    | 86 (15)  | 3.9 (0 to 9.7)     | +3.9 (-2.3 to +10.0)   | 0.22 |
| Appendectomy  | 717 (166) | 6.7 (4.8 to 8.6)    | 128 (45) | 5.2 (0.4 to 10.0)  | +1.5 (-3.9 to +6.9)    | 0.58 |
| Prostatectomy | 636 (79)  | 9.4 (7.1 to 11.7)   | 53 (12)  | 2.0 (0 to 10.2)    | +7.4 (-1.6 to +16.3)   | 0.11 |
| AAA repair    | 430 (60)  | 10.1 (7.0 to 13.1)  | 106 (14) | 8.2 (1.8 to 14.7)  | +1.8 (-5.8 to +9.4)    | 0.64 |
| Cystectomy    | 96 (23)   | 26.7 (16.1 to 37.2) | 8 (3)    | 42.6 (0 to 108.9)  | -15.9 (-89.0 to +57.2) | 0.66 |
| Hysterectomy  | 46 (29)   | -                   | 7 (6)    | -                  | -                      | -    |
| Thyroidectomy | 42 (23)   | -                   | 2 (2)    | -                  | -                      | -    |
| Liver         | 22 (9)    | -                   | 12 (5)   | -                  | -                      | -    |

### C. Length of stay

| Procedure        | Concordance                 |                         | Discordance                 |                         |                        | p-value |
|------------------|-----------------------------|-------------------------|-----------------------------|-------------------------|------------------------|---------|
|                  | No. patients (No. surgeons) | Adjusted LOS, d (95%CI) | No. patients (No. surgeons) | Adjusted LOS, d (95%CI) | Adjusted risk, (95%CI) |         |
| Knee replacement | 10319 (204)                 | 2.6 (2.6 to 2.7)        | 984 (31)                    | 2.7 (2.6 to 2.9)        | -0.1 (-0.3 to +0.1)    | 0.18    |
| Hip replacement  | 10217 (240)                 | 3.4 (3.3 to 3.5)        | 1412 (40)                   | 3.5 (3.3 to 3.7)        | -0.1 (-0.3 to +0.1)    | 0.09    |
| Laminectomy      | 5018 (114)                  | 5.4 (5.2 to 5.6)        | 730 (24)                    | 5.0 (4.5 to 5.6)        | +0.4 (-0.2 to +1.0)    | 0.87    |
| Cholecystectomy  | 1880 (209)                  | 5.2 (4.9 to 5.5)        | 424 (66)                    | 5.4 (4.8 to 6.0)        | -0.2 (-0.9 to +0.4)    | 0.40    |
| Colectomy        | 2177 (209)                  | 7.6 (7.3 to 7.8)        | 410 (58)                    | 7.2 (6.6 to 7.8)        | +0.4 (-0.3 to +1.1)    | 0.33    |
| CABG             | 1585 (53)                   | 10.0 (9.6 to 10.4)      | 673 (11)                    | 8.4 (8.0 to 8.9)        | +1.5 (+0.9 to +2.2)    | 0.07    |
| Lobectomy        | 1325 (50)                   | 5.4 (5.0 to 5.7)        | 87 (15)                     | 4.8 (3.4 to 6.1)        | +0.6 (-0.8 to +2.0)    | 0.22    |
| Appendectomy     | 723 (167)                   | 5.1 (4.7 to 5.5)        | 128 (45)                    | 5.1 (4.2 to 6.0)        | +0.0 (-1.0 to +1.0)    | 0.58    |
| Prostatectomy    | 636 (79)                    | 3.2 (2.9 to 3.5)        | 53 (12)                     | 2.4 (1.7 to 3.1)        | +0.8 (0.0 to +1.6)     | 0.11    |
| AAA repair       | 434 (60)                    | 4.0 (3.4 to 4.6)        | 106 (14)                    | 5.6 (3.9 to 7.3)        | -1.6 (-3.5 to +0.2)    | 0.64    |
| Cystectomy       | 96 (23)                     | 9.8 (7.7 to 12.0)       | 8 (3)                       | 0.6 (0 to 10.1)         | +9.2 (-1.7 to +20.1)   | 0.66    |
| Hysterectomy     | 46 (29)                     | -                       | 7 (6)                       | -                       | -                      | -       |
| Thyroidectomy    | 42 (23)                     | -                       | 2 (2)                       | -                       | -                      | -       |
| Liver            | 22 (9)                      | -                       | 12 (5)                      | -                       | -                      | -       |

Stratified analysis by procedure shows the association of patient-surgeon racial and ethnic concordance with adjusted 30-day post-operative mortality (A,B), 30-day post-operative readmission (C,D), and length of stay (E,F) among White patients following 14 common procedures (abdominal aortic aneurysm repair, appendectomy, coronary artery bypass grafting, cholecystectomy, cystectomy, hip replacement, hysterectomy, knee replacement, laminectomy, liver resection, lung resection, prostatectomy, and thyroidectomy) using

Medicare data from 2016-2019, calculated using marginal standardization from linear probability models, controlling for patient (age, sex, race and ethnicity, 27 chronic conditions, median household income, dual-eligibility for Medicaid) procedure (weekend surgery, electiveness of surgery, month, year), surgeon (age, sex, procedure volume), and hospital (size, teaching, urban/rural, and ownership status) characteristics.. Abbreviations: AAA, abdominal aortic aneurysm; CABG, coronary artery bypass grafting. Separate regressions were performed for each surgical procedure; due to small sample sizes for certain operations, the model did not converge and we are unable to report adjusted mortality rate for those individual procedures. Estimated adjusted outcome lower bound set at 0. Abbreviations: d, day; LOS, length of stay.; pp, percentage point.

**eTable 15:** Secondary analysis for composite outcome of readmission or mortality within 30 days of procedure date**A. Black and Hispanic patients**

|                                         | Black patients        |                     | Black patients<br>Adjusted risk<br>difference, pp<br>(95%CI) | p-<br>value | Hispanic patients   |                     | Hispanic patients<br>Adjusted risk<br>difference, pp<br>(95%CI) | p-<br>value |
|-----------------------------------------|-----------------------|---------------------|--------------------------------------------------------------|-------------|---------------------|---------------------|-----------------------------------------------------------------|-------------|
|                                         | Concordant            | Discordant          |                                                              |             | Concordant          | Discordant          |                                                                 |             |
| <b>Adjusted outcome rate, % (95%CI)</b> | 11.2<br>(6.6 to 15.8) | 8.5<br>(7.2 to 9.9) | +2.7<br>(-2.2 to +7.6)                                       | 0.28        | 5.2<br>(3.5 to 7.0) | 8.2<br>(7.3 to 9.1) | -3.0<br>(-5.0 to -0.9)                                          | 0.005       |

**B. White patients**

|                                          | White patients      |                     | White patients<br>Adjusted risk<br>difference, pp<br>(95%CI) | p-<br>value |
|------------------------------------------|---------------------|---------------------|--------------------------------------------------------------|-------------|
|                                          | Concordant          | Discordant          |                                                              |             |
| <b>Adjusted outcomes rate, % (95%CI)</b> | 7.9<br>(7.6 to 8.2) | 8.4<br>(7.6 to 8.2) | -0.5<br>(-1.4 to +0.4)                                       | 0.26        |

Association between patient-surgeon racial and ethnic concordance and composite outcome of 30-day mortality or readmission among Black, Hispanic, and White patients, using Medicare data from 2016-2019 calculated using marginal standardization from linear probability models, controlling for patient (age, sex, race and ethnicity, 27 chronic conditions, median household income, dual-eligibility for Medicaid) procedure (procedure type, weekend surgery, electiveness of surgery, month, year), surgeon (age, sex, procedure volume), and hospital (size, teaching, urban/rural, and ownership status) characteristics. Abbreviations: d, day; LOS, length of stay.; pp, percentage point. \*unit: adjusted days
